# Supplementary material for: Phenotypes in siblings with homozygous mutations of TRAPPC9 and/or MCPH1 support a bifunctional model of MCPH1
Source: PubMed Central journal article supplement (PMC6081227; doi:10.1002/mgg3.400), 2018-04-24
Supplement: MGG3-6-660-s002.pdf [file MGG3-6-660-s002.pdf]

|                                 | defect                               | number of affected children | OFC at birth               | OFC after age 1 yr                                        | short stature                                     | mental retardation | language                | psychomotor delay | hyperkinesia                                                   | seizures | facial features                                                                                                                                                                        | other features                                                        | MRI                                                                                                                                                                                                                       |
|---------------------------------|--------------------------------------|-----------------------------|----------------------------|-----------------------------------------------------------|---------------------------------------------------|--------------------|-------------------------|-------------------|----------------------------------------------------------------|----------|----------------------------------------------------------------------------------------------------------------------------------------------------------------------------------------|-----------------------------------------------------------------------|---------------------------------------------------------------------------------------------------------------------------------------------------------------------------------------------------------------------------|
| <b>Mir et al. (2009)</b>        | c.1423C>T, p.R475X                   | 8                           |                            | 1 pt normal, 2 pts around the fifth centile, 3 pts -2/3SD | no                                                | moderate to severe | few words               | yes               |                                                                | pt2: yes |                                                                                                                                                                                        | pt3: mild kyphosis                                                    | diminished cerebral white matter volume with sulcal enlargement, thinning of the corpus callosum, and mildly reduced cerebellar volume ; several areas of T2 hyperintensity in the subcortical white matter               |
| <b>Mochida et al. (2009)</b>    | c.1423C>T, p.R475X                   | 3                           | -1,3SD; -0,3SD; -2SD       | -4,1SD; -3,3SD; -5,8SD                                    |                                                   | moderate to severe | few words               | no                | pt1: bruxism and hand-flapping movements                       |          |                                                                                                                                                                                        |                                                                       | thin corpus callosum and reduced volume of the cerebral white matter                                                                                                                                                      |
| <b>Abou Jamra et al. (2011)</b> | c.1423C>T, p.R475X                   | 6                           |                            | <<3rd centile                                             | moderate to severe (15th centile to <3rd centile) | moderate to severe | absent                  | severe            | neonatal hypotonia, stereotypic movements, hand-flapping       | pt1: yes | <i>low frontal hairline, synophrys</i>                                                                                                                                                 | pt4,5,6: spontaneously losing their teeth and losing weight after 20y |                                                                                                                                                                                                                           |
| <b>Giorgio et al. (2016)</b>    | c.1423C>T, p.R475X                   | 1                           |                            | <3rd centile                                              | no                                                | severe             | absent                  | severe            | stereotypic movements (hand shaking, waving, and body rocking) | no       | <i>brachycephaly, round face, thin and horizontal eyebrows, synophrys, deep set eyes, wide nasal bridge, thin upper lip</i>                                                            | obesity                                                               | severe corpus callosum thinning, clear reduction of the white matter with poor myelination, normal cerebellum                                                                                                             |
| <b>Mir et al. (2009)</b>        | c.2311-2314 delTGTT, p.Leu772TrpfsX7 | 4                           |                            | -1 to -3SD                                                |                                                   | severe             | absent                  | yes               |                                                                | no       |                                                                                                                                                                                        |                                                                       |                                                                                                                                                                                                                           |
| <b>Philippe et al. (2009)</b>   | c.1708C>T, p.R570X                   | 3                           | normal                     | -2SD; -1SD (later -3SD); -2SD                             | no                                                | severe             | speech delay            | yes               | hyperactivity                                                  |          | <i>hypertelorism, short neck, prominent upper central incisors, short and smooth philtrum; pt2: unilateral labial cleft</i>                                                            | truncular obesity; pt2: long and thin fingers                         | unusual white matter abnormalities with discordance between T2 and FLAIR sequences (normal myelination on T2 sequence, but important white matter abnormalities on FLAIR sequence)                                        |
| <b>Kakar et al. (2012)</b>      | c.1024+1G>T                          | 4                           |                            | little below 3rd centile                                  | no                                                | severe             | few words               | yes               | pt2: muscular weakness                                         | no       |                                                                                                                                                                                        |                                                                       |                                                                                                                                                                                                                           |
| <b>Marangi et al. (2013)</b>    | c.2851-2A4 C, p.T951Y fsX17          | 2                           |                            | 10th centile; <2nd centile                                | no                                                | severe             | absent                  | yes               | hypotonia after birth; pt1: tapering fingers                   | pt1: yes | <i>peculiar craniofacial appearance, including brachycephaly, round face, hypertelorism, straight eyebrows, synophrys, wide nasal bridge, and thin upper lip with downturned mouth</i> | pt1: clinodactily of the fifth finger                                 | diminished cerebral white matter volume, with marked sulcal enlargement, thinning of the corpus callosum, and reduced cerebellar volume ; several areas of T2 hyperintensity were present in the subcortical white matter |
| <b>Present patients</b>         | c.533T>C, p.Leu178Pro                | 2                           | microcephaly at birth (OFC | -4SD; -2,8SD                                              | no                                                | severe             | pt1: no; pt2: few words | severe            | yes                                                            | pt1: yes | <i>pt1: sloping forehead</i>                                                                                                                                                           | no                                                                    | atrophy of the corpus callosum, pt1 white matter abnormalities                                                                                                                                                            |

|  |  |  |            |  |  |  |  |  |  |  |  |  |  |  |
|--|--|--|------------|--|--|--|--|--|--|--|--|--|--|--|
|  |  |  | not known) |  |  |  |  |  |  |  |  |  |  |  |
|--|--|--|------------|--|--|--|--|--|--|--|--|--|--|--|

Supplementary File 2. Clinical features in reported cases of TRAPPC9 defects and in the present probands
